# Supplementary material for: Global reconstruction of historical ocean heat storage and transport
Source: PubMed Central journal article supplement (PMC6347704; doi:10.1073/pnas.1808838115), 2019-01-07
Supplement: pnas.1808838115.sapp.pdf [file pnas.1808838115.sapp.pdf]

# Supporting Information (SI Appendix): Global reconstruction of historical ocean heat storage and transport

Zanna et al. 10.1073/pnas.1808838115

Here we present further information on the availability of the products used in our study, the uncertainty quantification in GF and datasets, and the regional time-dependent OHC estimates.

**A. Data Availability.** In addition to the references provided in the main text and the *Materials and Methods* section, we are listing the links to all datasets used in the present study. The ECCO-GODAE data can be downloaded from <http://www.ecco-group.org/products.htm>. The Hadley centers SST datasets are at <https://www.metoffice.gov.uk/hadobs/hadisst/>. The NCEI OHC and salinity data are available at [https://www.nodc.noaa.gov/OC5/3M\\_HEAT\\_CONTENT/heat\\_global.html](https://www.nodc.noaa.gov/OC5/3M_HEAT_CONTENT/heat_global.html) and [https://www.nodc.noaa.gov/cgi-bin/OC5/SAL\\_ANOM/showfiganom.pl?action=start](https://www.nodc.noaa.gov/cgi-bin/OC5/SAL_ANOM/showfiganom.pl?action=start), respectively. The IAP, Ishii and Domingues data are available from <http://159.226.119.60/cheng/>, <https://climate.mri-jma.go.jp/pub/ocean/ts/v7.2/doc/00README>, and [http://www.cmar.csiro.au/sealevel/thermal\\_expansion\\_ocean\\_heat\\_timeseries.html](http://www.cmar.csiro.au/sealevel/thermal_expansion_ocean_heat_timeseries.html), respectively.

**B. Code Availability.** The TMM code and climatological transport matrices extracted from the ECCO-GODAE state estimate are available on GitHub <https://github.com/samarkhathiwala/tmm>, and the GFs are available from the corresponding author upon request.

**C. Error Estimates: GFs reconstructions.** The OHC reconstruction from GFs presented in this study is subject to two primary sources of uncertainty: 1) errors in the imperfect representation of ocean transport processes (e.g., advection, mixing) in ECCO-GODAE, which can be due to the model resolution and parametrizations and/or the lack of data in some regions - this will then translate into errors in the computed GFs and pathways between the ocean interior and the surface; and 2) errors in SSTs due to poor spatial and temporal sampling, particularly outside the Atlantic basin and in the early part of the record. In this study, we have devised a strategy, described below, to both minimize the dependence of the OHC estimates on model and observational biases, and also to partially account for the uncertainty associated with the imperfect knowledge of ocean transport and SSTs from data and ECCO-GODAE.

We select broad areas both at the surface for SSTs and in the ocean interior for the GFs, which led to more robust patterns of OHC and associated uncertainties despite reducing the horizontal resolution of the estimates. The transport matrix and GFs, themselves, are subject to uncertainty associated with the ECCO-GODAE representation of ventilation pathways, which are affected in part by model resolution and numerical mixing. The patterns and magnitude of the ECCO-GODAE time-mean barotropic and Sverdrup transport are in agreement to those derived directly from observational products

(1–4). However, a comparison of simulated bomb radiocarbon with observations suggests that shallow-to-deep exchange in ECCO-GODAE may be too efficient (5, 6). Despite this bias, the inventory and spatial distribution of anthropogenic CO<sub>2</sub> simulated by ECCO-GODAE have been shown to be in line with observational estimates (6, 7). In addition, a detailed analysis (8) using a more recent version of ECCO, which is not qualitatively different from previous ECCO versions (except for the longer period of assimilation), produces abyssal heat content changes at high Southern latitudes that are consistent with those of (9) (as also shown here in Fig. 1C).

Nonetheless, ECCO-GODAE pathways are derived from an ocean model at 1° horizontal resolution which inevitably possesses some biases, despite being constrained by observations. To include this uncertainty, without having to recalculate the GFs for several ocean reanalyses, which is computationally challenging, we have opted to perturb our estimates of the GFs. The uncertainty in observationally-based, basin-averaged GFs has been estimated to be O(10-20%) (10). In addition, crude estimates derived from previous studies (5, 6) suggest O(20-30%) error in shallow to deep exchange of water. Finally, comparison of ocean reanalysis products (11) shows a 20 to 30% spread in the amplitude of the upper and lower overturning cells. Therefore, we perturb the GFs by 20% in the upper 2000 m and 40% below 2000m in an attempt to represent the transport uncertainty derived from ocean reanalyses, and tracer-based observational estimates. The perturbations are applied while imposing mass conservation by renormalizing the GFs. This uncertainty representation is potentially conservative and will be investigated in future work by using GFs estimated from different observation-based products (e.g., other ECCO state estimates, or direct climatological products such as GLODAP), and/or over different time periods.

Finally, we convolve the GFs with 10 different realizations from HadISST v2.0, rather than using HadISST v1 alone to include uncertainty in surface boundary conditions. The ensemble-mean estimate of OHC, from 1955 onwards, based on HadISST v2.0 is only within 2% of the one based on HadISST v1. The error prior to 1955 is large due to the reduced availability of surface temperatures. Using two additional SST estimates from the NOAA Extended Reconstruction SSTs V4 (12) or from COBE (13) did not result in different OHC estimates (less than a few percents change) and those estimates are therefore left out of the present study.

Overall, the OHC and associated errors from the GFs are comparable to the ensemble-mean and the spread from different observational estimates (e.g., 14, 15, and Fig.1 here). The values of regional trends in OHC and thermosteric sea level rise mentioned in the manuscript are only discussed if the discrepancies between observations and GF estimates are larger than the error estimates derived here.

**D. Error estimates: observational products.** There is a vast literature describing observational products and associated errors (e.g., 16–18). In addition to the sparsity of the data, especially at high latitudes and in the early part of the historical record, there are other factors leading to uncertainty in OHC estimates: error related to the measurements themselves (i.e., instrumental error), and errors due to the methods used to filling the gap in data sampling. The methods include infilling of data gaps via statistical methods, which often relies on knowledge of temporal and spatial covariance of the data. The uncertainty associated with mapping techniques has been well documented in previous studies (18, 19). Other methods to cover the gap in sampling is to rely on data assimilation techniques, which combines observations with a numerical model – none used in the present study (20). As shown in Fig. 1, there are substantial differences among the observationally-based estimates using direct in-filling. Our GFs estimates are often situated within the bounds of the different products, except perhaps for the early part of the record – however error uncertainty estimates might also be underestimated in all products. To easily compare with observations, we have presented the observational linear trends in Fig. 1 (and associated discussion in the main manuscript) as an ensemble-mean, with the error given by the one standard deviation. This type of quantification of uncertainty estimate is likely optimistic, as discussed by (4), especially given that the uncertainty associated with the sparsity of data in the earlier part of the record are not adequately represented by such an unbiased uncertainty quantification.

**E. Timeseries of OHC as a function of latitudes.** Heat redistribution by changes in ocean circulation integrates to zero globally; a property that is respected by the use of GFs. However, as shown in Fig. 3, a signature of ocean circulation change is present on a regional scale in the North Atlantic. Since the OHC trends are not necessarily linear, and exhibit strong variability on a wide range of timescales (Figs. 1 and 3), let us consider the temporal evolution of OHC. In the Southern Ocean between 80° S and 60° S, there are weak trends over 1955–2017 in both observations (Figs. S3, grey shading representing observational estimates) and GFs (orange curves). Note that the lack of trends in the Southern Ocean could be due to lack of observations (21). Between 60° S and 40° S, the increase in heat storage is weaker in the GF estimates than that observed (0.03 ZJ/°lat), yet still within observational uncertainty. There is a warming trend at all latitudes ranging from 60° S to 20° N in both GF estimates and observations, with magnitudes of 1–2 and 0.5–1 ZJ/°lat, respectively, occurring in the upper 2000 m over the last 60 years. Between 20° N and 50° N, discrepancies in trends and variability between the GF and observational estimates are further discernible, indicating strong changes in ocean transport on all timescales.

At high latitudes in both hemispheres, there is a signature of decadal variability in the upper 2000 m, rather than distinct warming trends. Between 80° S and 60° S in the Southern Ocean, the low-frequency variability in the GF and observational timeseries are anti-correlated (Fig. S3), indicating a role for ocean circulation change on decadal timescales in the Weddell and Ross Sea regions and north of it as the water enters the Atlantic and Pacific Oceans. In observations, this variability is significant in the South Atlantic south of 40° S, with an amplitude of up to 0.3 ZJ/°lat, while in the GF

estimates only south of 60° S is the decadal variability (on the order of 0.2 ZJ/°lat) dominating the linear trend. In the North Atlantic, the GF-inferred variability is substantial in both the subtropical and subpolar gyres, and can be comparable to the trend, as discussed in the main text. Decadal variability dominates north of 50° N with no obvious detectable warming or cooling trends (similarly to SSTs, Fig. S1) in observations and GF estimates. However, the magnitude of North Atlantic OHC changes in observations is rather different than in GF estimates. Figs. 3 and S3 are therefore consistent and ocean transport must have been altered to explain the observed patterns of warming north of 20° S. However, the cause ocean transport changes remain to be further analyzed, in particular the contribution of natural variability and anthropogenic forcing.

1. Wunsch C (2011) The decadal mean ocean circulation and sverdrup balance. *Journal of Marine Research* 69(2-3):417–434.
2. Forget G, et al. (2015) Ecco version 4: An integrated framework for non-linear inverse modeling and global ocean state estimation. *Geosc. Model Dev.* 8(10):3071.
3. Thomas MD, De Boer AM, Johnson HL, Stevens DP (2014) Spatial and temporal scales of sverdrup balance. *Journal of Physical Oceanography* 44(10):2644–2660.
4. Wunsch C (2016) Global ocean integrals and means, with trend implications. *Annual Review of Marine Science* 8(1):1–33.
5. Graven HD, Gruber N, Key R, Khatiwala S, Giraud X (2012) Changing controls on oceanic radiocarbon: New insights on shallow-to-deep ocean exchange and anthropogenic CO<sub>2</sub> uptake. *J. Geophys. Res.* 117.
6. Graven HD, Gruber N, Payne S, Heimbach P (2018) Changes to the air-sea flux and distribution of radiocarbon in the ocean over the 21st century. *Geophysical Research Letters* 45(11):5617–5626.
7. Khatiwala S, et al. (2013) Global ocean storage of anthropogenic carbon. *Biogeosciences*.
8. Wunsch C, Heimbach P (2014) Bidecadal Thermal Changes in the Abyssal Ocean. *J. Phys. Oceanogr.* 44(8):2013–2030.
9. Purkey SG, Johnson GC (2010) Warming of global abyssal and deep southern ocean waters between the 1990s and 2000s: Contributions to global heat and sea level rise budgets. *Journal of Climate* 23(23):6336–6351.
10. Khatiwala S, Primeau F, Holzer M (2012) Ventilation of the deep ocean constrained with tracer observations and implications for radiocarbon estimates of ideal mean age. *Earth and Planetary Science Letters* 325:116–125.
11. Karspeck AR, et al. (2017) Comparison of the atlantic meridional overturning circulation between 1960 and 2007 in six ocean reanalysis products. *Climate Dynamics* 49(3):957–982.
12. Huang B, et al. (2015) Extended reconstructed sea surface temperature version 4 (ersst.v4). part i: upgrades and intercomparisons. *Journal of climate* 28(3):911–930.
13. Hirahara S, Ishii M, Fukuda Y (2014) Centennial-scale sea surface temperature analysis and its uncertainty. *Journal of Climate* 27(1):57–75.
14. Hartmann D, et al. (2013) *Observations: Atmosphere and Surface*, eds. Stocker T, et al. (Cambridge University Press, Cambridge, United Kingdom and New York, NY, USA), pp. 159–254.
15. Church J, et al. (2013) *Sea Level Change*, eds. Stocker T, et al. (Cambridge University Press, Cambridge, United Kingdom and New York, NY, USA), pp. 1137–1216.
16. WCRP Global Sea Level Budget Group (2018) Global sea level budget 1993–present. *Earth Syst. Sci. Data* 10:1551–1590.
17. Abraham JP, et al. (2013) A review of global ocean temperature observations: Implications for ocean heat content estimates and climate change. *Reviews of Geophysics* 51(3):450–483.
18. Boyer T, et al. (2016) Sensitivity of global upper-ocean heat content estimates to mapping methods, xbt bias corrections, and baseline climatologies. *Journal of Climate* 29(13):4817–4842.
19. Cheng L, et al. (2017) Improved estimates of ocean heat content from 1960 to 2015. *Science Advances* 3(3):e1601545.
20. Storto A, et al. (2017) Steric sea level variability (1993–2010) in an ensemble of ocean reanalyses and objective analyses. *Climate Dynamics* 49(3):709–729.
21. Gille ST (2002) Warming of the southern ocean since the 1950s. *Science* 295(5558):1275–1277.

249  
250  
251  
252  
253  
254  
255  
256  
257  
258  
259  
260  
261  
262  
263  
264  
265  
266  
267  
268  
269  
270  
271  
272  
273  
274  
275  
276  
277  
278  
279  
280  
281  
282  
283  
284  
285  
286  
287  
288  
289  
290  
291  
292  
293  
294  
295  
296  
297  
298  
299  
300  
301  
302  
303  
304  
305  
306  
307  
308  
309  
310

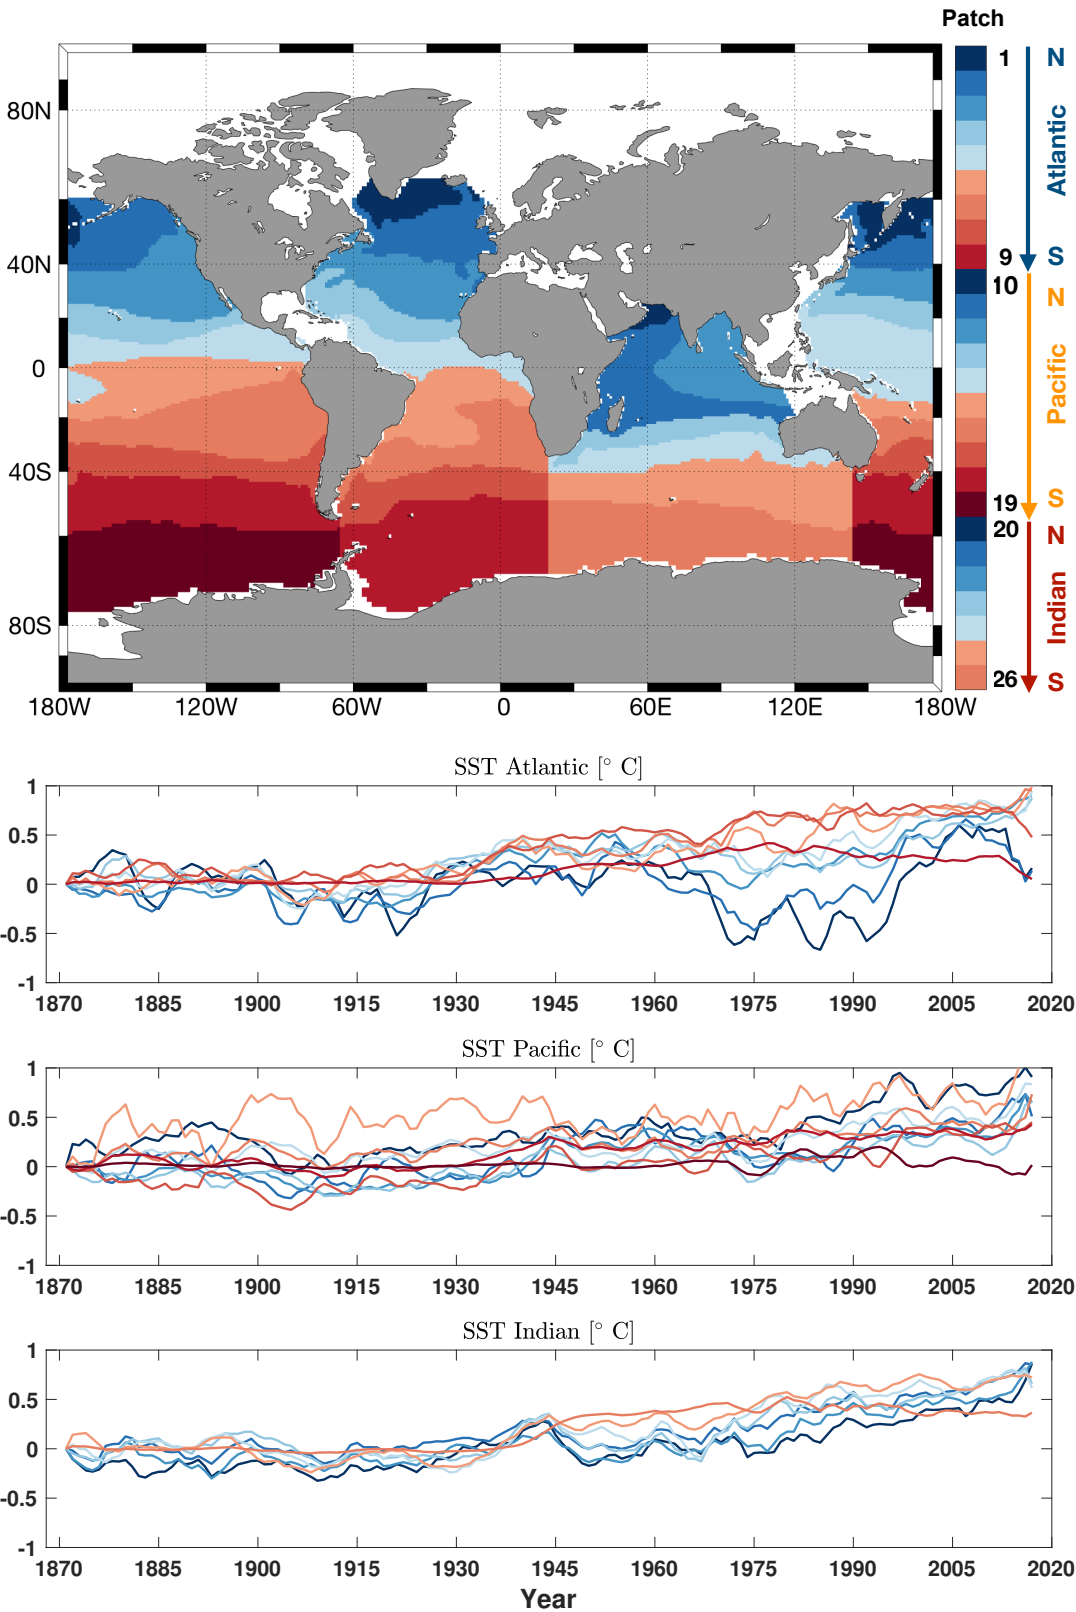

**Fig. S1.** Areas for the 26 surface patches used for the SST anomalies, and associated area-weighted timeseries from HadISST1 for individual patches in the Atlantic Ocean (top), Pacific Ocean (middle), and Indian Ocean (bottom). The colorbar is associated with the patch number in each basin.

311  
312  
313  
314  
315  
316  
317  
318  
319  
320  
321  
322  
323  
324  
325  
326  
327  
328  
329  
330  
331  
332  
333  
334  
335  
336  
337  
338  
339  
340  
341  
342  
343  
344  
345  
346  
347  
348  
349  
350  
351  
352  
353  
354  
355  
356  
357  
358  
359  
360  
361  
362  
363  
364  
365  
366  
367  
368  
369  
370  
371  
372

373  
374  
375  
376  
377  
378  
379  
380  
381  
382  
383  
384  
385  
386  
387  
388  
389  
390  
391  
392  
393  
394  
395  
396  
397  
398  
399  
400  
401  
402  
403  
404  
405  
406  
407  
408  
409  
410  
411  
412  
413  
414  
415  
416  
417  
418  
419  
420  
421  
422  
423  
424  
425  
426  
427  
428  
429  
430  
431  
432  
433  
434

435  
436  
437  
438  
439  
440  
441  
442  
443  
444  
445  
446  
447  
448  
449  
450  
451  
452  
453  
454  
455  
456  
457  
458  
459  
460  
461  
462  
463  
464  
465  
466  
467  
468  
469  
470  
471  
472  
473  
474  
475  
476  
477  
478  
479  
480  
481  
482  
483  
484  
485  
486  
487  
488  
489  
490  
491  
492  
493  
494  
495  
496

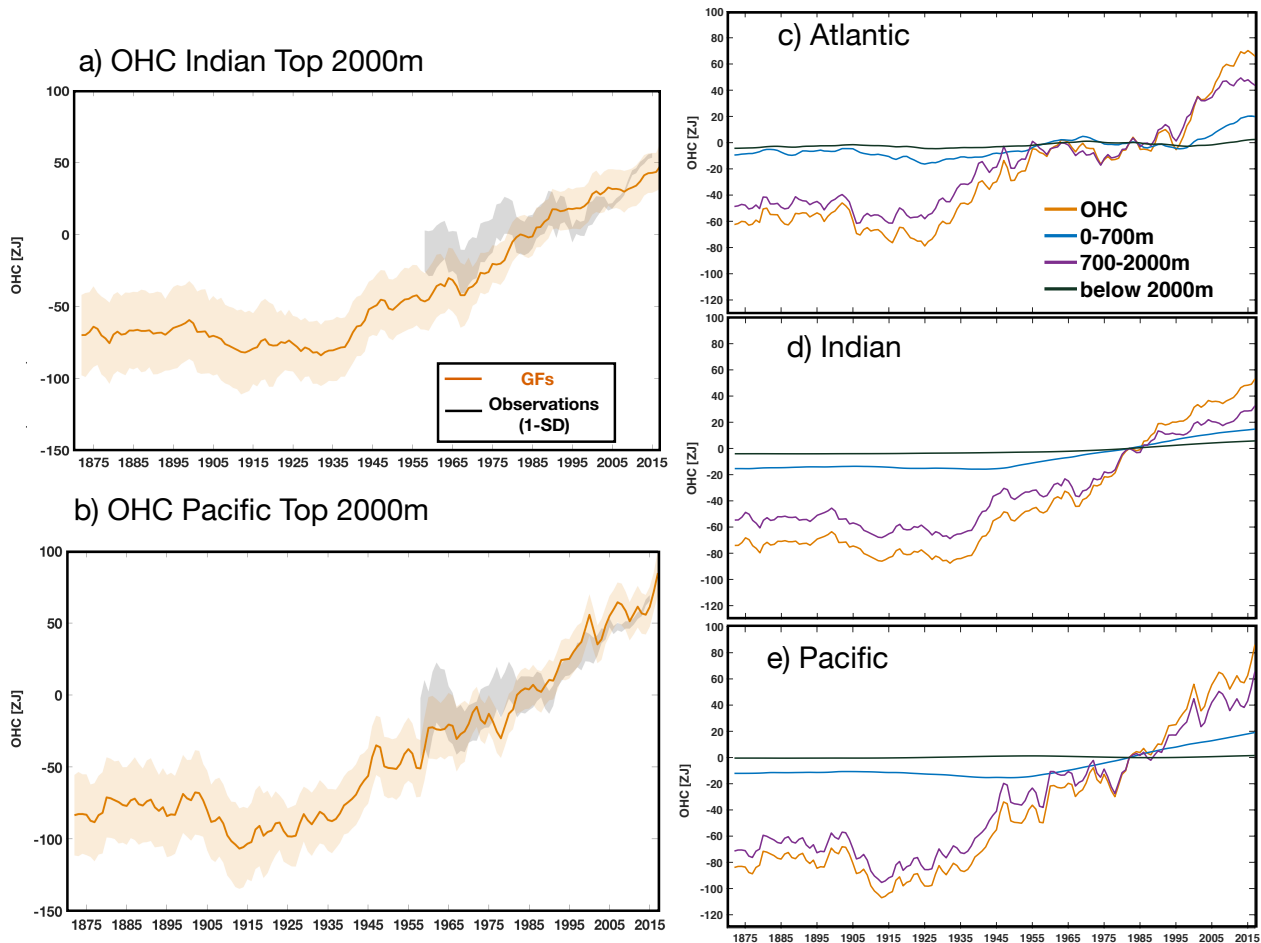

**Fig. S2.** Timeseries of OHC change in ZJ ( $1ZJ = 10^{21}J$ ). Change, relative to 2006-2014, for the top 2000 m in the a) Indian Ocean, and b) Pacific Ocean for the GFs estimates (orange) and observational estimates (grey). GFs estimates, relative to 1971, in the c) Atlantic basin; d) Indian basin; e) Pacific basin for different depth ranges: orange = full depth; purple = 0-700 m ; blue = 700-2000 m; green = below 2000 m.

OHC (top 2000m) timeseries for different latitudes [ZJ/ °lat]

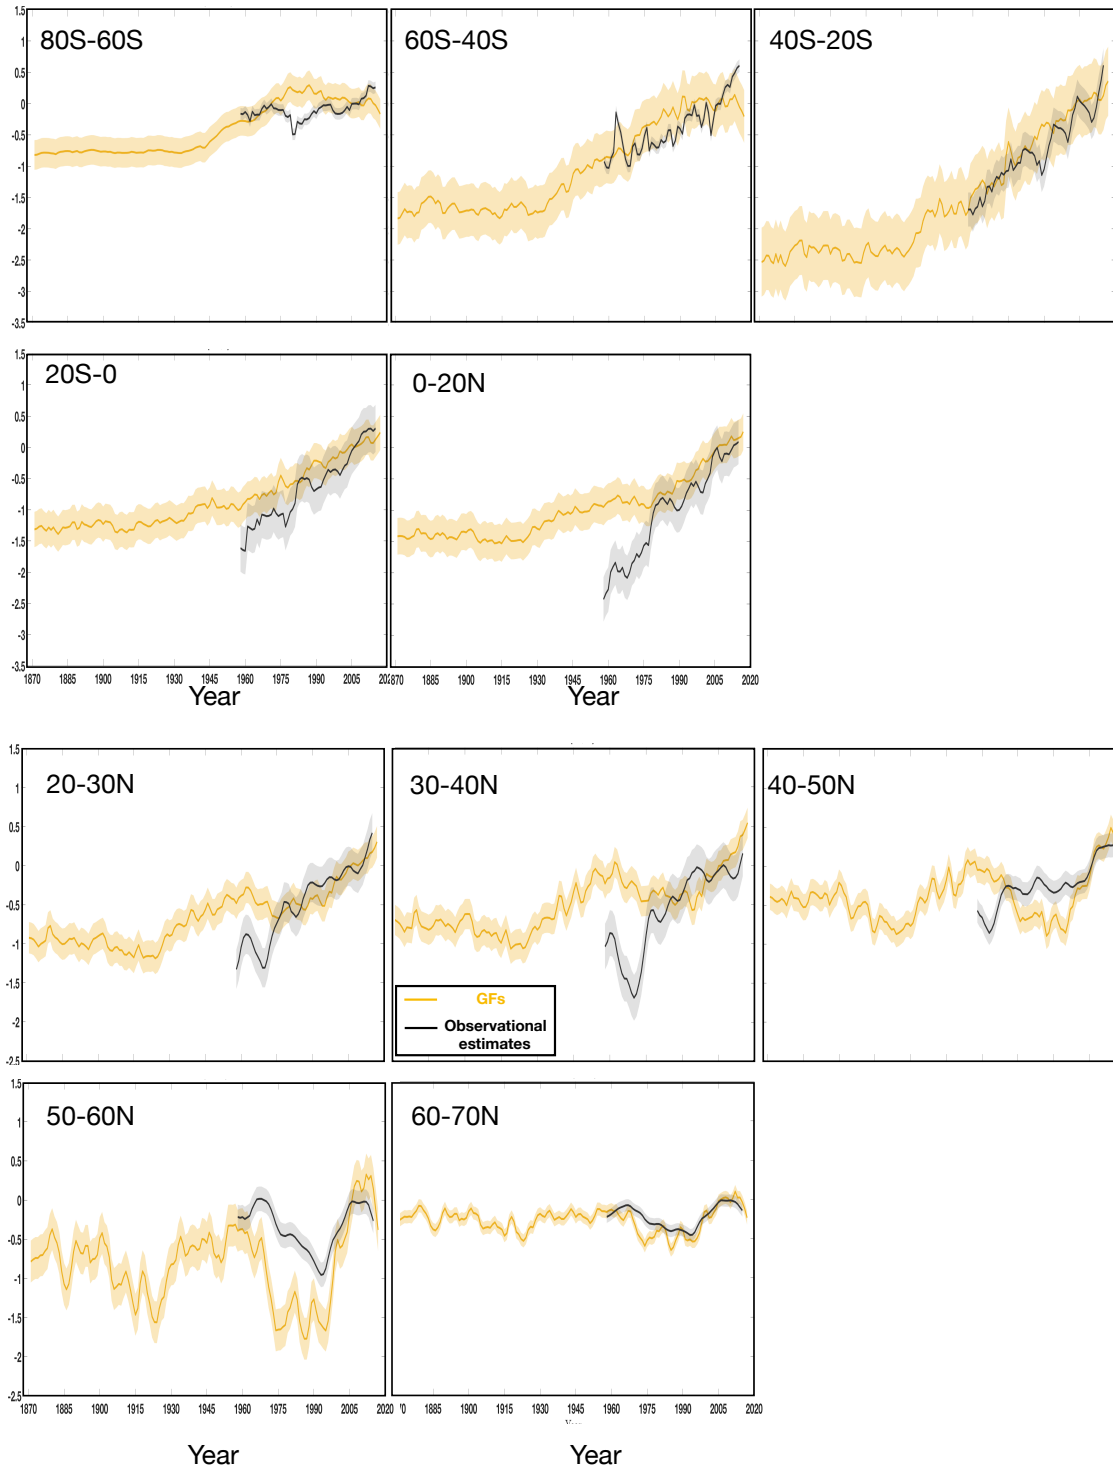

Fig. S3. Timeseries of Atlantic OHC in the upper 2000 m, in [ZJ / °lat], using 20° or 10° latitudinal bands. This includes the reconstruction based on GFs (orange) and the ensemble mean of all observational estimates (black), and associated uncertainty (shading).

621  
622  
623  
624  
625  
626  
627  
628  
629  
630  
631  
632  
633  
634  
635  
636  
637  
638  
639  
640  
641  
642  
643  
644  
645  
646  
647  
648  
649  
650  
651  
652  
653  
654  
655  
656  
657  
658  
659  
660  
661  
662  
663  
664  
665  
666  
667  
668  
669  
670  
671  
672  
673  
674  
675  
676  
677  
678  
679  
680  
681  
682

683  
684  
685  
686  
687  
688  
689  
690  
691  
692  
693  
694  
695  
696  
697  
698  
699  
700  
701  
702  
703  
704  
705  
706  
707  
708  
709  
710  
711  
712  
713  
714  
715  
716  
717  
718  
719  
720  
721  
722  
723  
724  
725  
726  
727  
728  
729  
730  
731  
732  
733  
734  
735  
736  
737  
738  
739  
740  
741  
742  
743  
744

Atlantic Linear Trends 1871-1955

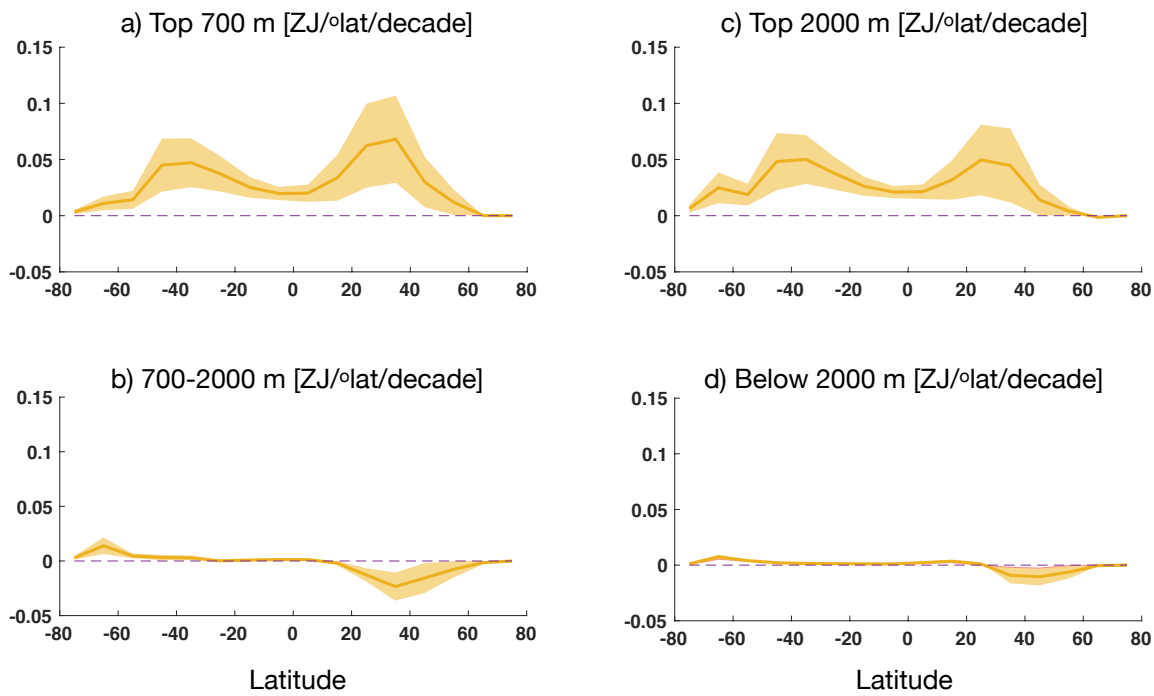

Fig. S4. Atlantic OHC GFs trends for 1871 to 1955 as a function of latitudes, as in Fig 3A-D: a) Top 700 m; b) 700-2000 m; c) top 2000 m; d) below 2000 m.
